# Supplementary material
Source: PubMed Central journal article supplement (PMC4682314)
Supplement: supp_tpc.15.00196_TPC2015-00196-RAR2_Supplemental_Data.pdf [file supp_tpc.15.00196_TPC2015-00196-RAR2_Supplemental_Data.pdf]

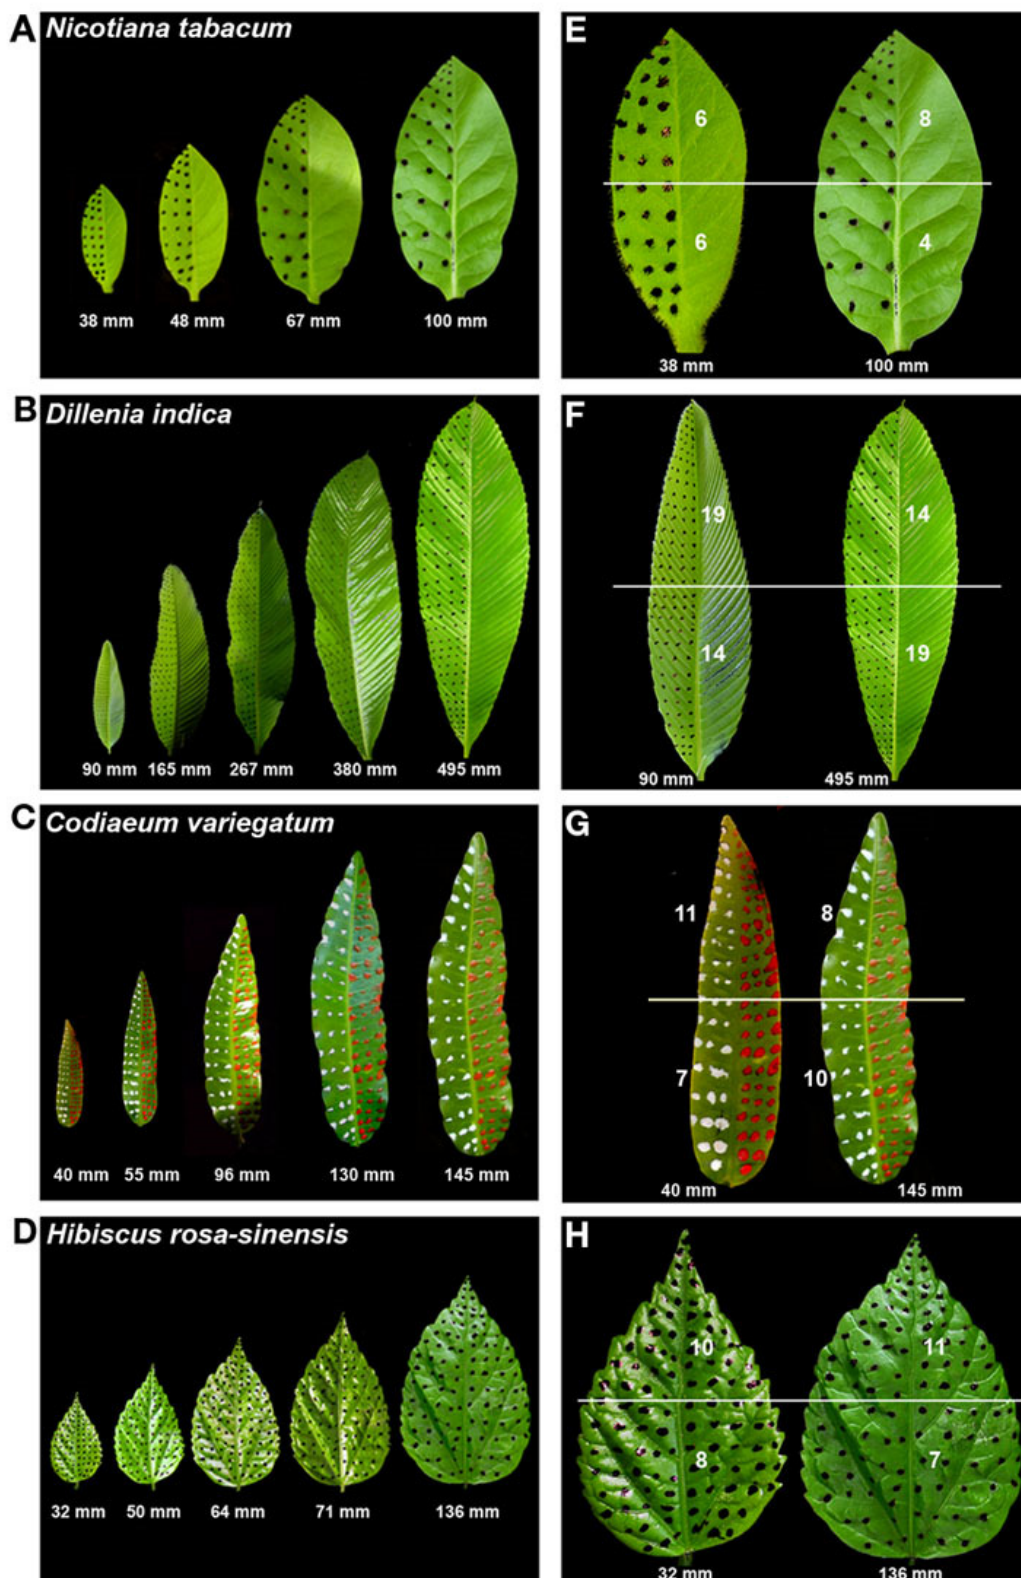

**Supplemental Figure 1. Ink-tracking studies on growing leaves reveal different forms of polar growth in leaves.** (A-D) Panels showing different growth stages of leaves that were marked with ink spots early in growth (picture on the left in each panel). Leaf lengths are indicated. (E-H) Comparative distribution of ink spots in young and mature leaves. Lengths of the young and the mature leaves have been normalized and a horizontal line has been drawn through the middle of the leaves. The numbers above and below the lines indicate the number of spots adjacent to the midrib of the leaf. Leaf lengths are indicated.

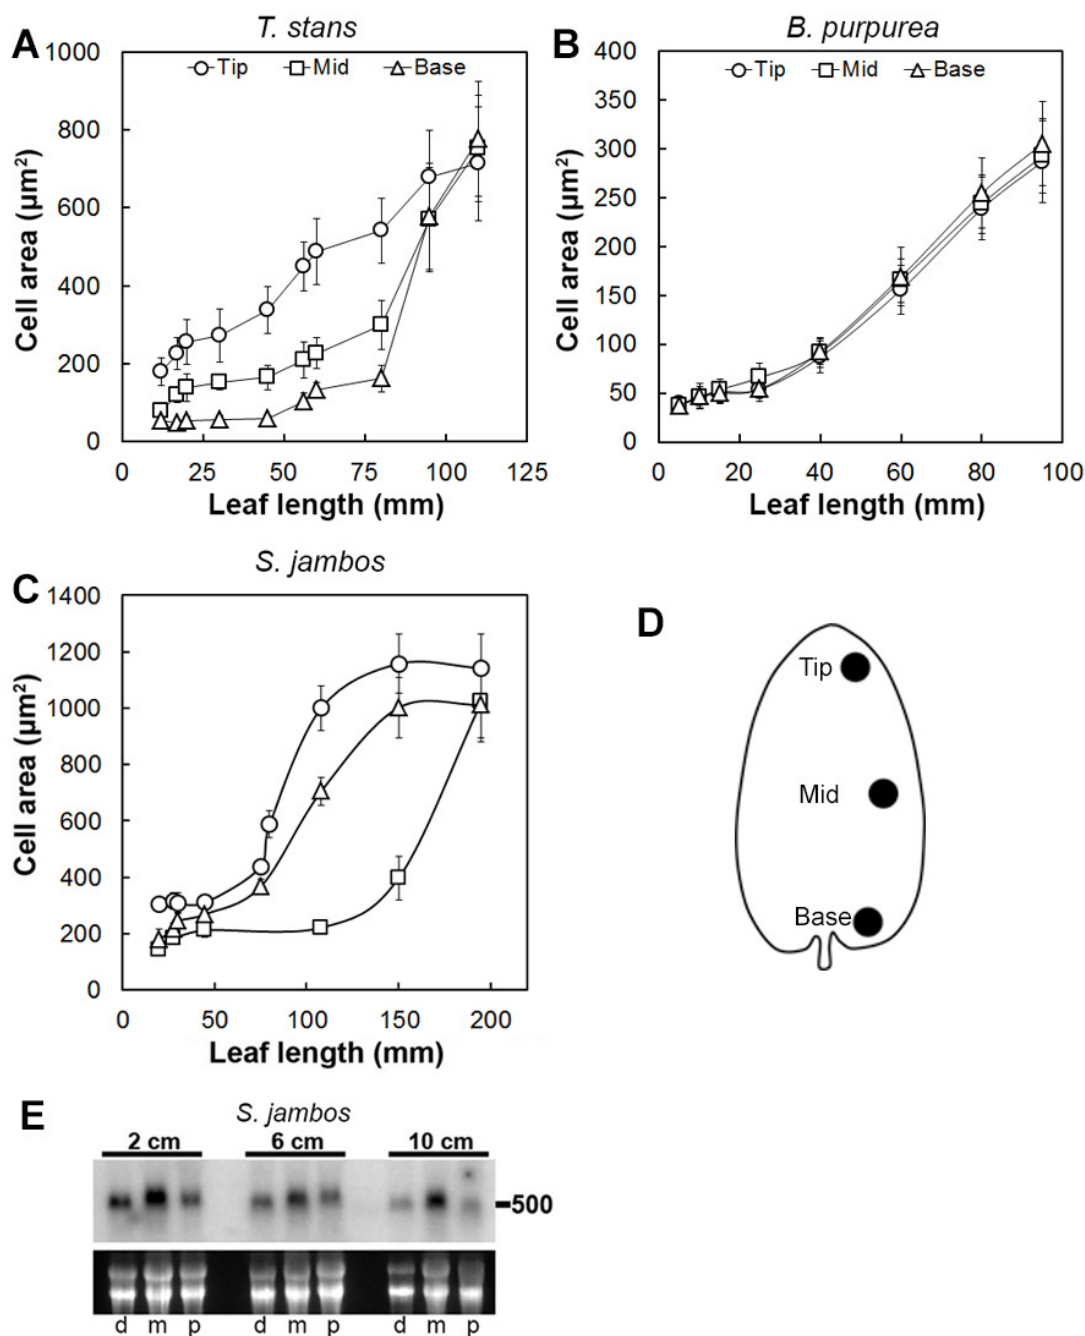

**Supplemental Figure 2. Epidermal cell-size in growing leaves of *T. stans*, *B. purpurea*, and *S. jambos*.** Epidermal cell size on the adaxial surface of leaves at different developmental stages. Cells were measured near tip (○), middle (□) and base (△) ( $n = 250-500$ ; average  $\pm$  SD). (D) Schematic representation showing the regions of the leaves used to measure the cell areas. (E) RNA gel blot showing the distribution of *HISTONE H4* at different developmental stages of *S. jambos* leaves. Leaf lengths (in cm) are indicated above the blots. Proximal, medial and distal parts of the leaves are represented by p, m and d, respectively. The migration of a 500 base single-stranded RNA marker is shown. Ethidium bromide-stained gel is shown below the blot to indicate RNA loading.

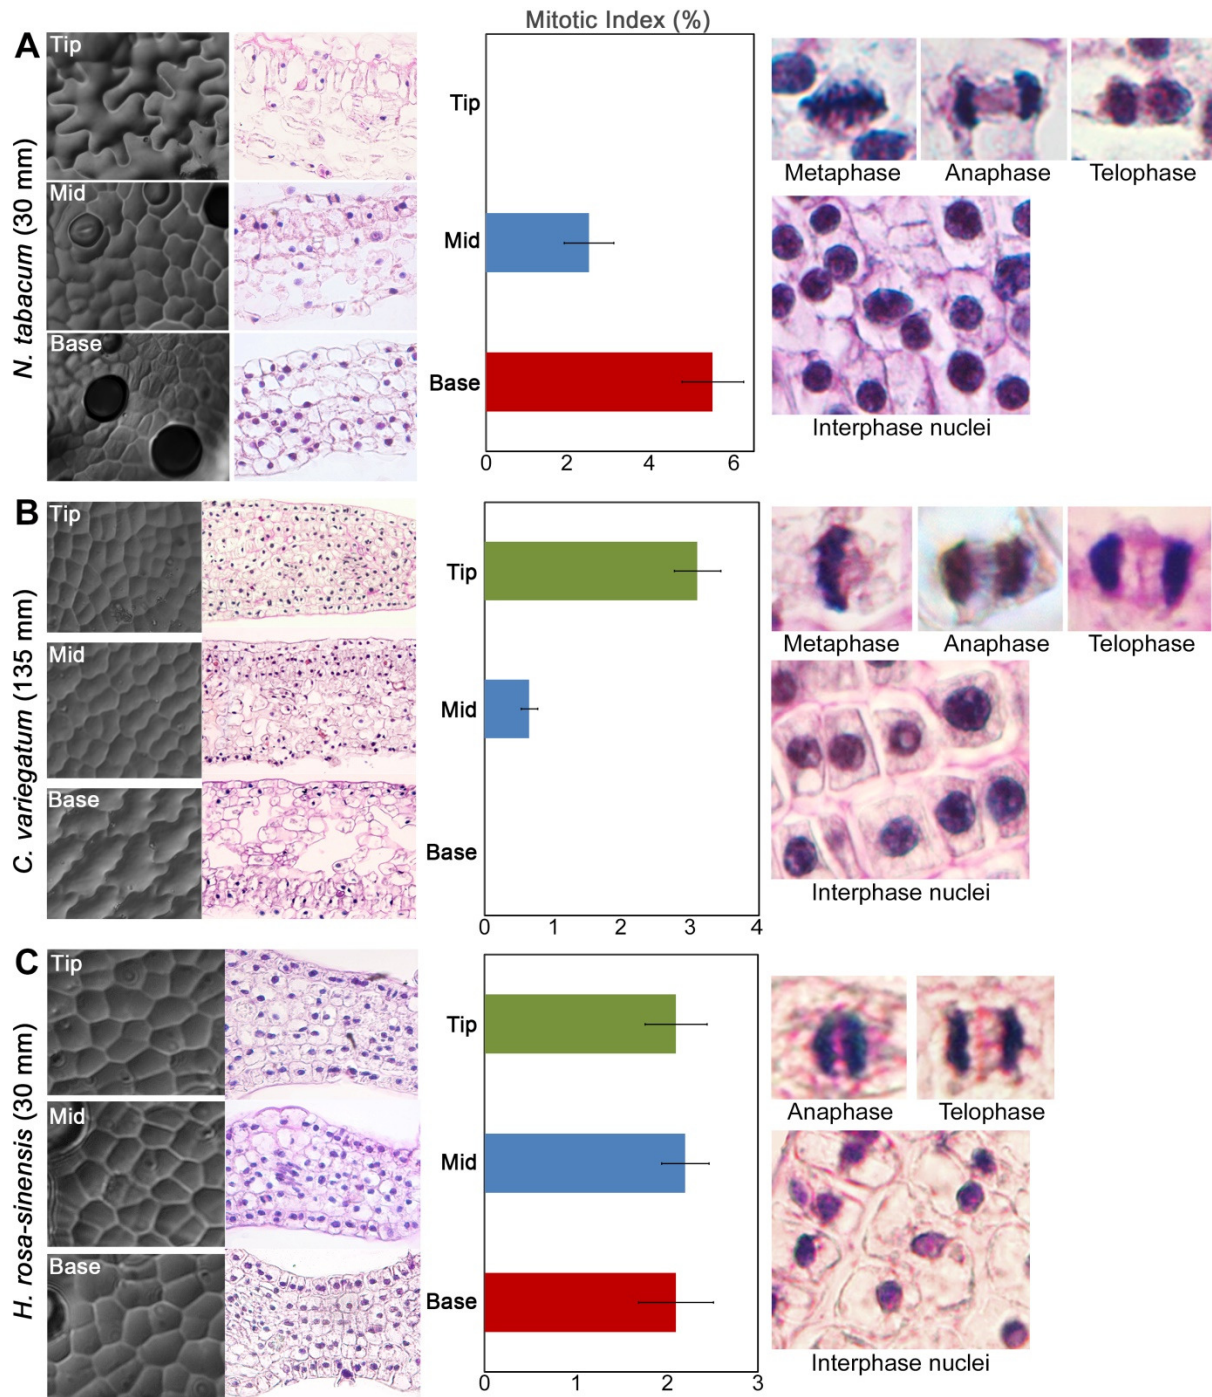

**Supplemental Figure 3. Correlation between epidermal cell morphology, tissue anatomy, and cell division.** Adaxial epidermal cell morphology (left panels) and the associated internal tissue anatomy from tip, middle, and basal regions of *N. tabacum* (A), *C. variegatum* (B) and *H. rosa-sinensis* (C) leaves of indicated lengths. Surface imprints (shown in the left panels) were taken before fixing the tissues for histochemical staining. Dark circles on the imprints in (A) are distortions caused by the trichomes. Mitotic indices from the leaf sections near the tip (green bars), middle (blue bars) and base (red bars) are shown as bar graphs ( $n=1000-1500$ ; average  $\pm$  SD). Representative mitotic nuclei used for calculation of mitotic indices are shown on the right for each species.

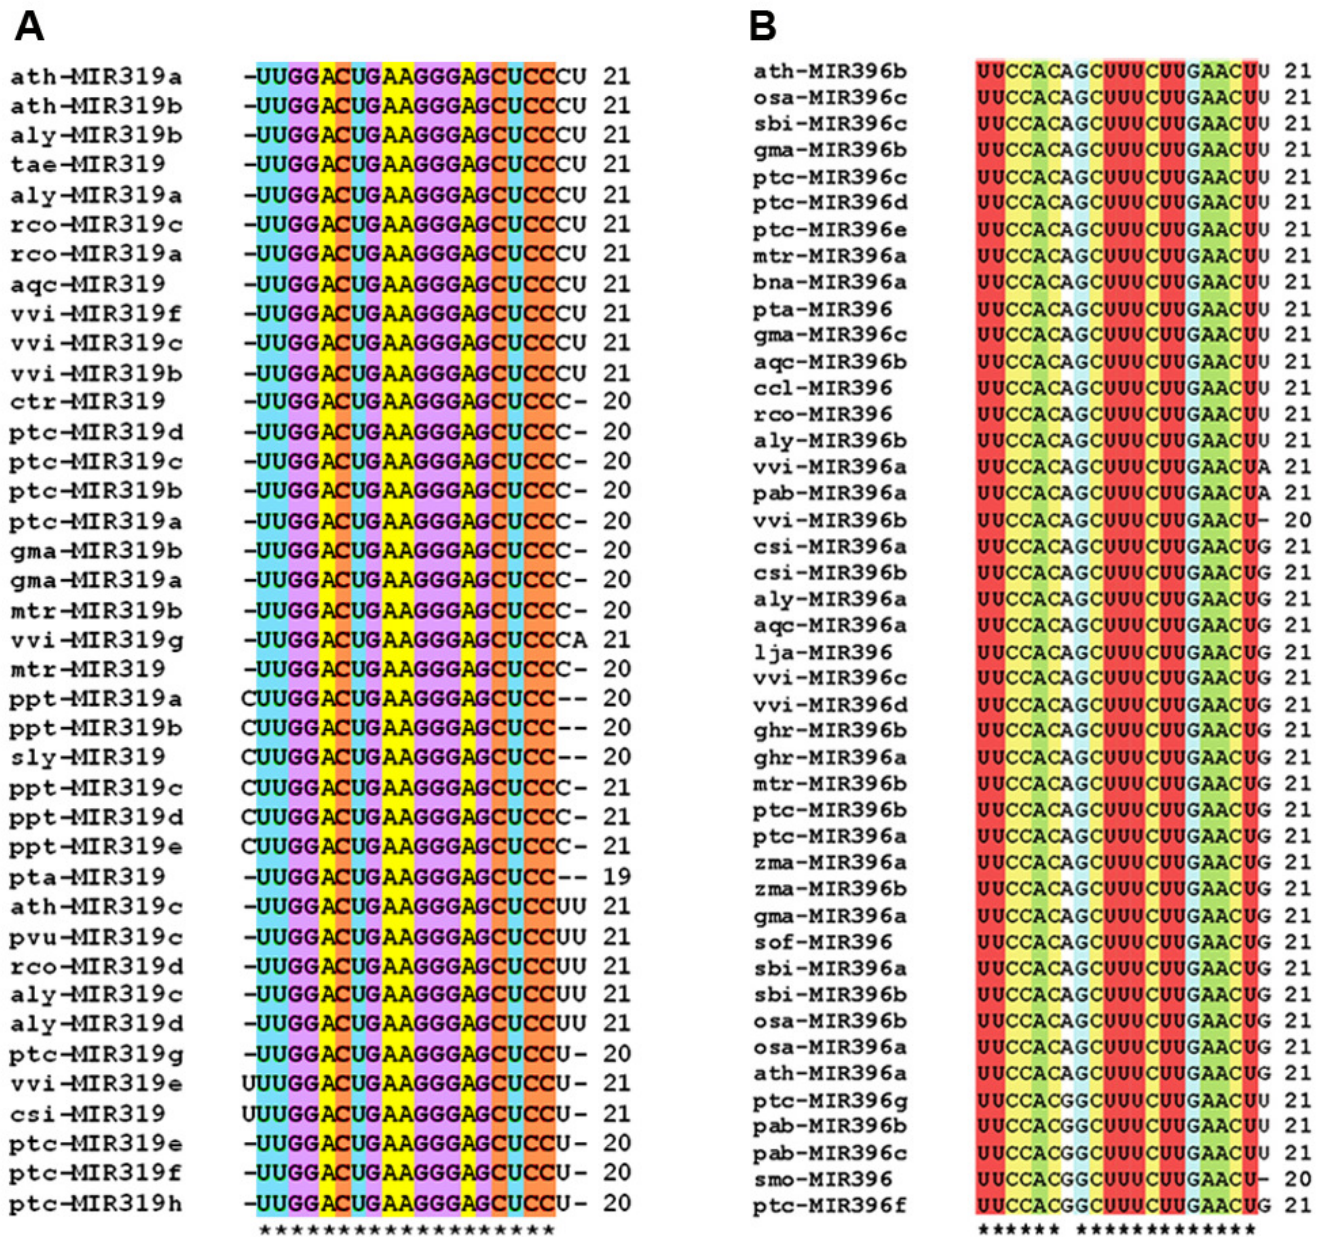

**Supplemental Figure 4. Sequence alignment of miR319 and miR396 from different species. (A)** miR319 (B) miR396. Sequences were retrieved from miRbase (<http://www.mirbase.org>) and aligned using ClustalW with default settings. ath - *Arabidopsis thaliana*; aly - *Arabidopsis lyrata*; ptc – *Populus trichocarpa*; osa – *Oriza sativa*; vvi – *Vitis vinifera*; sly – *Solanum lycopersicum*; mtr – *Medicago truncatula*; lja - *Lotus japonicus*; ppt - *Physcomitrella patens*; rco – *Ricinus communis*; ctr - ; gma - *Glycine max*; sbi - *Shorgum bicolor*; pta – *Pinus taeda*; Zma - *Zea maize*; csi - *Citrus sinensis*; bna- *Brassica napus*; aqc - *Aquilegia caerulea*; pab – *Picea abies*; sof – *Saccharum officinarum*; smo – *Selaginella moellendorffii*. Accession numbers for these sequences are given in Supplemental Table 3.

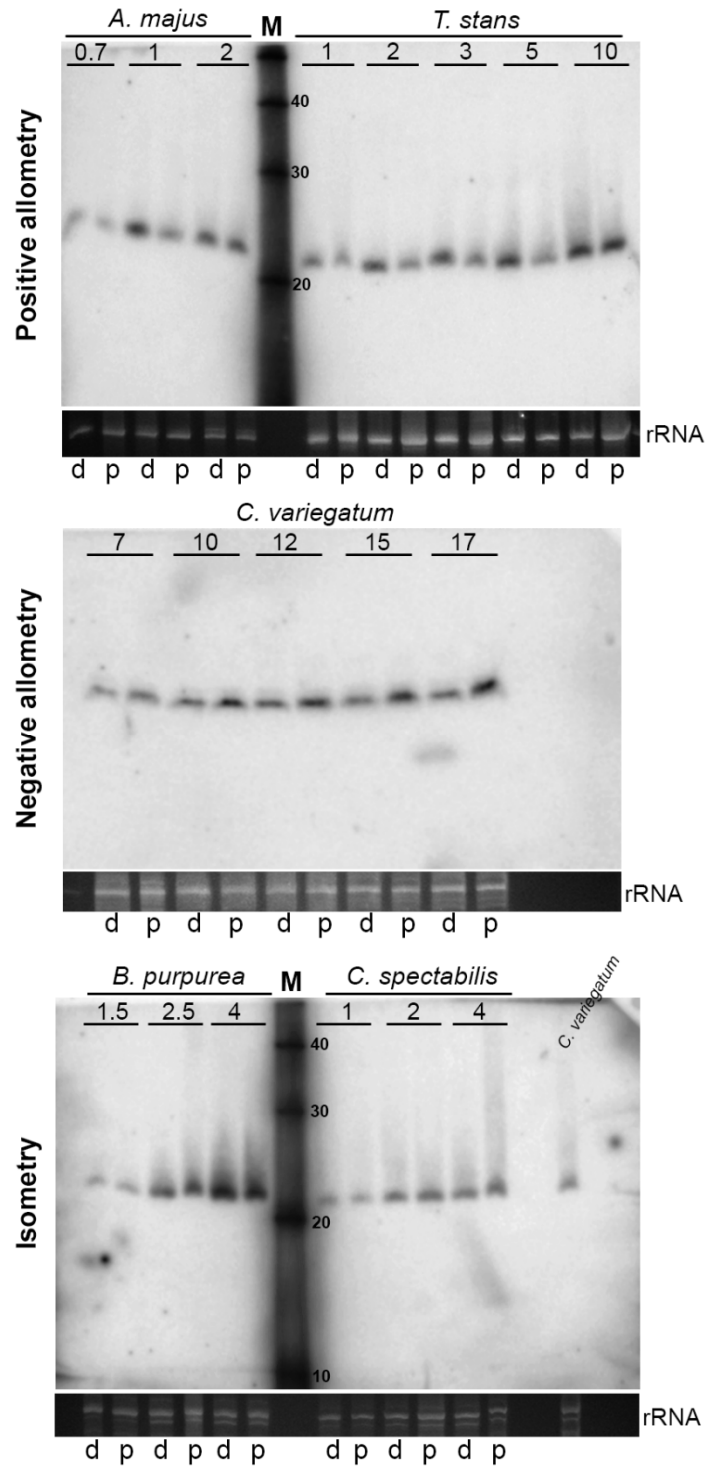

**Supplemental Figure 5. Expression patterns of miR396 in developing leaves.** Full length small RNA gel blots showing the expression of miR396 in the distal (d) and proximal (p) halves of developing leaves with positive allometry, negative allometry, and isometry. Molecular weights (M) of single-stranded RNA markers are indicated. All blots were repeated 3-5 times and similar results were obtained. The plant species are indicated above the blots. Numbers above the blots indicate leaf length in cm. Ethidium bromide-stained gels are shown below the blots as loading controls.

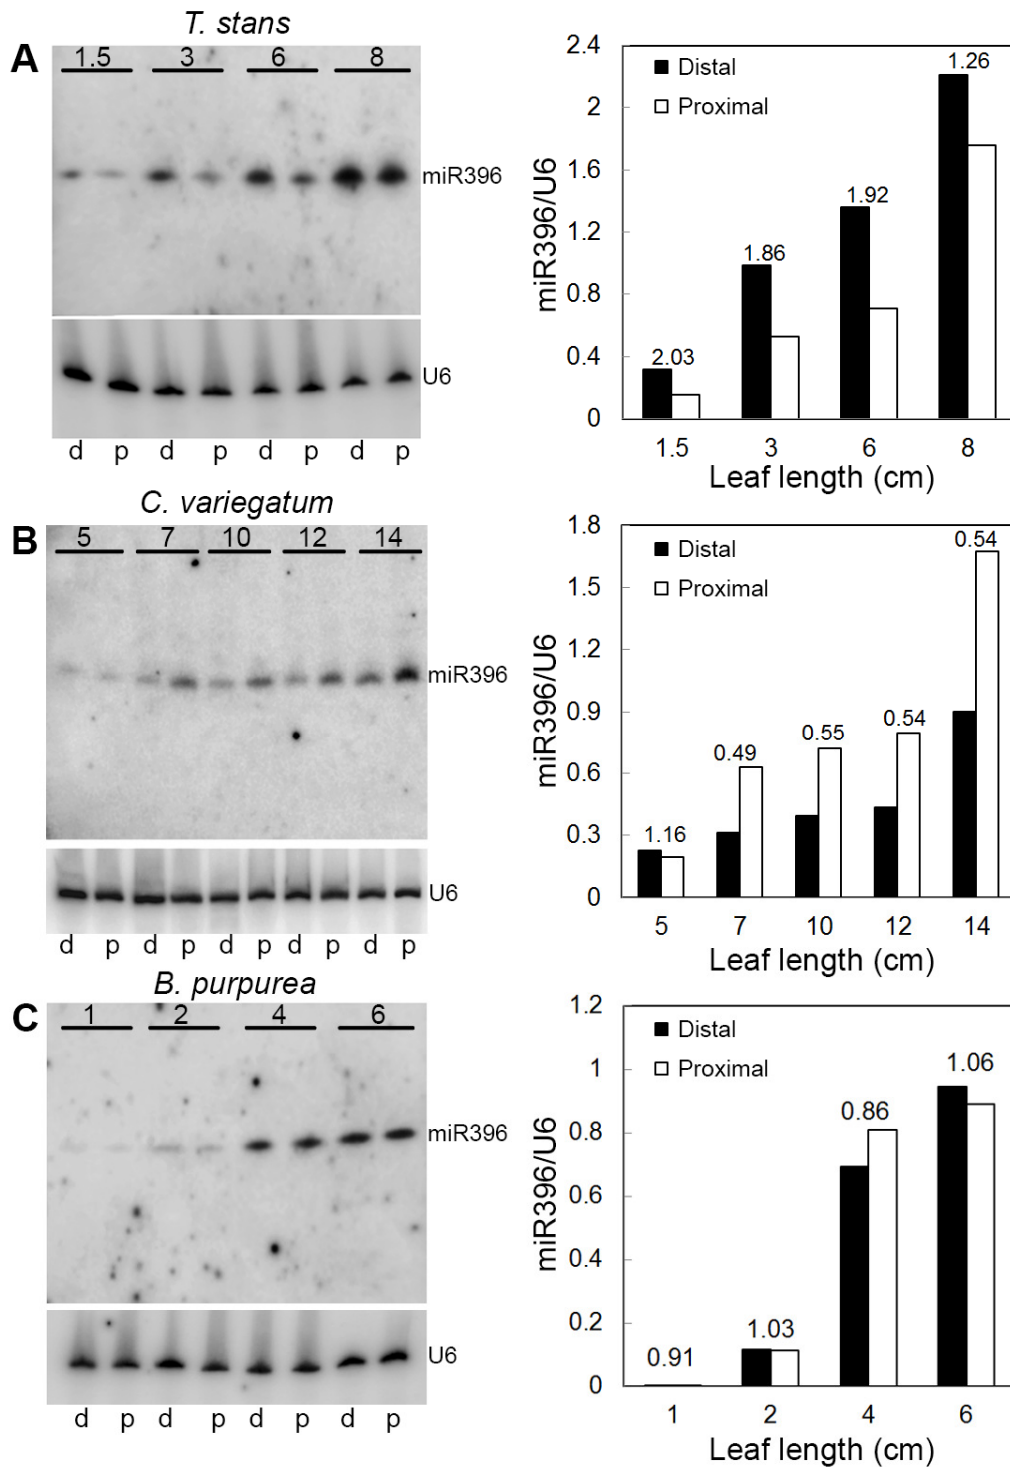

**Supplemental Figure 6. Quantification of relative distribution of miR396 in developing leaves.**

Left panels show the small RNA gel blots and the right panels show the quantification of band intensities. Levels of miR396 were normalized relative to *U6* RNA. The ratios of the expression levels in the distal (d) to the proximal (p) halves are indicated above the bars. All blots were repeated 3-5 times and similar results were obtained. The plant species are indicated above the blots. Numbers above the blots indicate leaf length in cm.



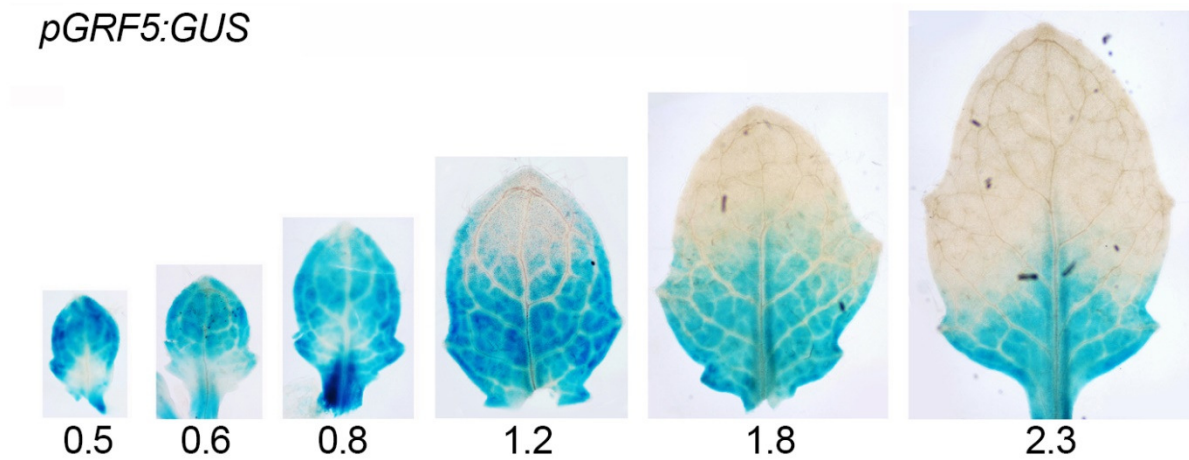

**Supplemental Figure 8. Promoter activity of *At-GRF5*.** (A) GUS histochemical staining of *pGRF5:GUS* leaves showing the promoter activity of *GRF5* in the 5<sup>th</sup> leaf of *Arabidopsis*.



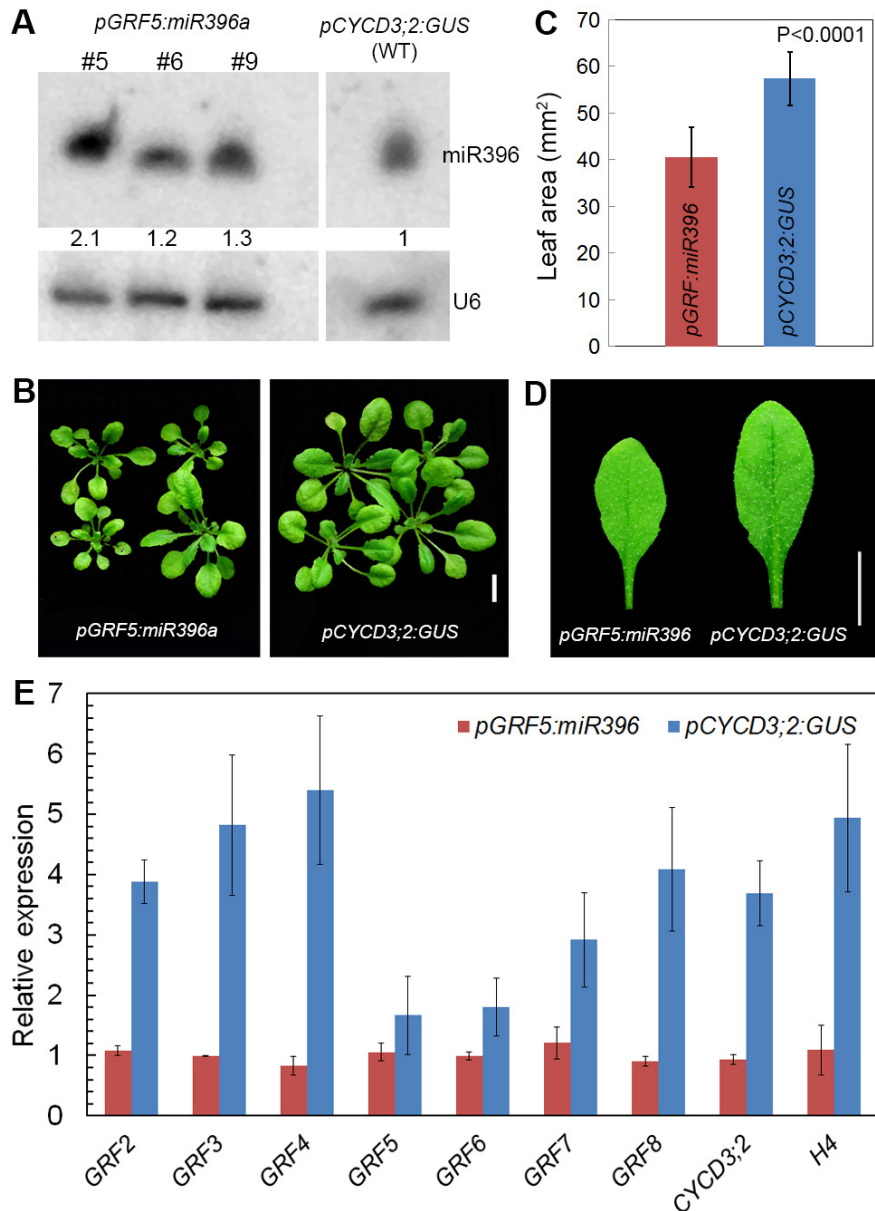

**Supplemental Figure 9. Expression of miR396 and phenotypes of transgenic *Arabidopsis* plants with altered miR396 expression.** (A) Small RNA gel blot showing the altered expression of miR396 in three independent *pGRF5:miR396a* transgenic lines (#5, #6 and #9) and WT with the indicated genotypes. Values for relative expression of miR396 normalized to *U6* are indicated below the blots. (B) Rosettes of 20-day-old *Arabidopsis* plants with the indicated genotypes. (C) Area of the 5<sup>th</sup> leaf in 20-day-old plants of indicated genotypes ( $n=25-30$ ; average  $\pm$  SD). Leaf areas for the transgenic lines were calculated from three independent lines for each genotype. The P value represents the results of two-tailed Mann-Whitney test on the two groups of data sets using GraphPad Prism (Version 5.01). (D) 5<sup>th</sup> leaf from 20-day-old plants of indicated genotypes. Scale bars in (B, D), 1 cm. (E) RT-qPCR analysis of expression levels of *GRFs*, *CYCD3;2* and *H4* in 10-day-old rosettes of WT and *pGRF5:miR396a* plants. The expression levels were normalized to *ACTIN-2* expression ( $n=3$ ; average  $\pm$  SD).

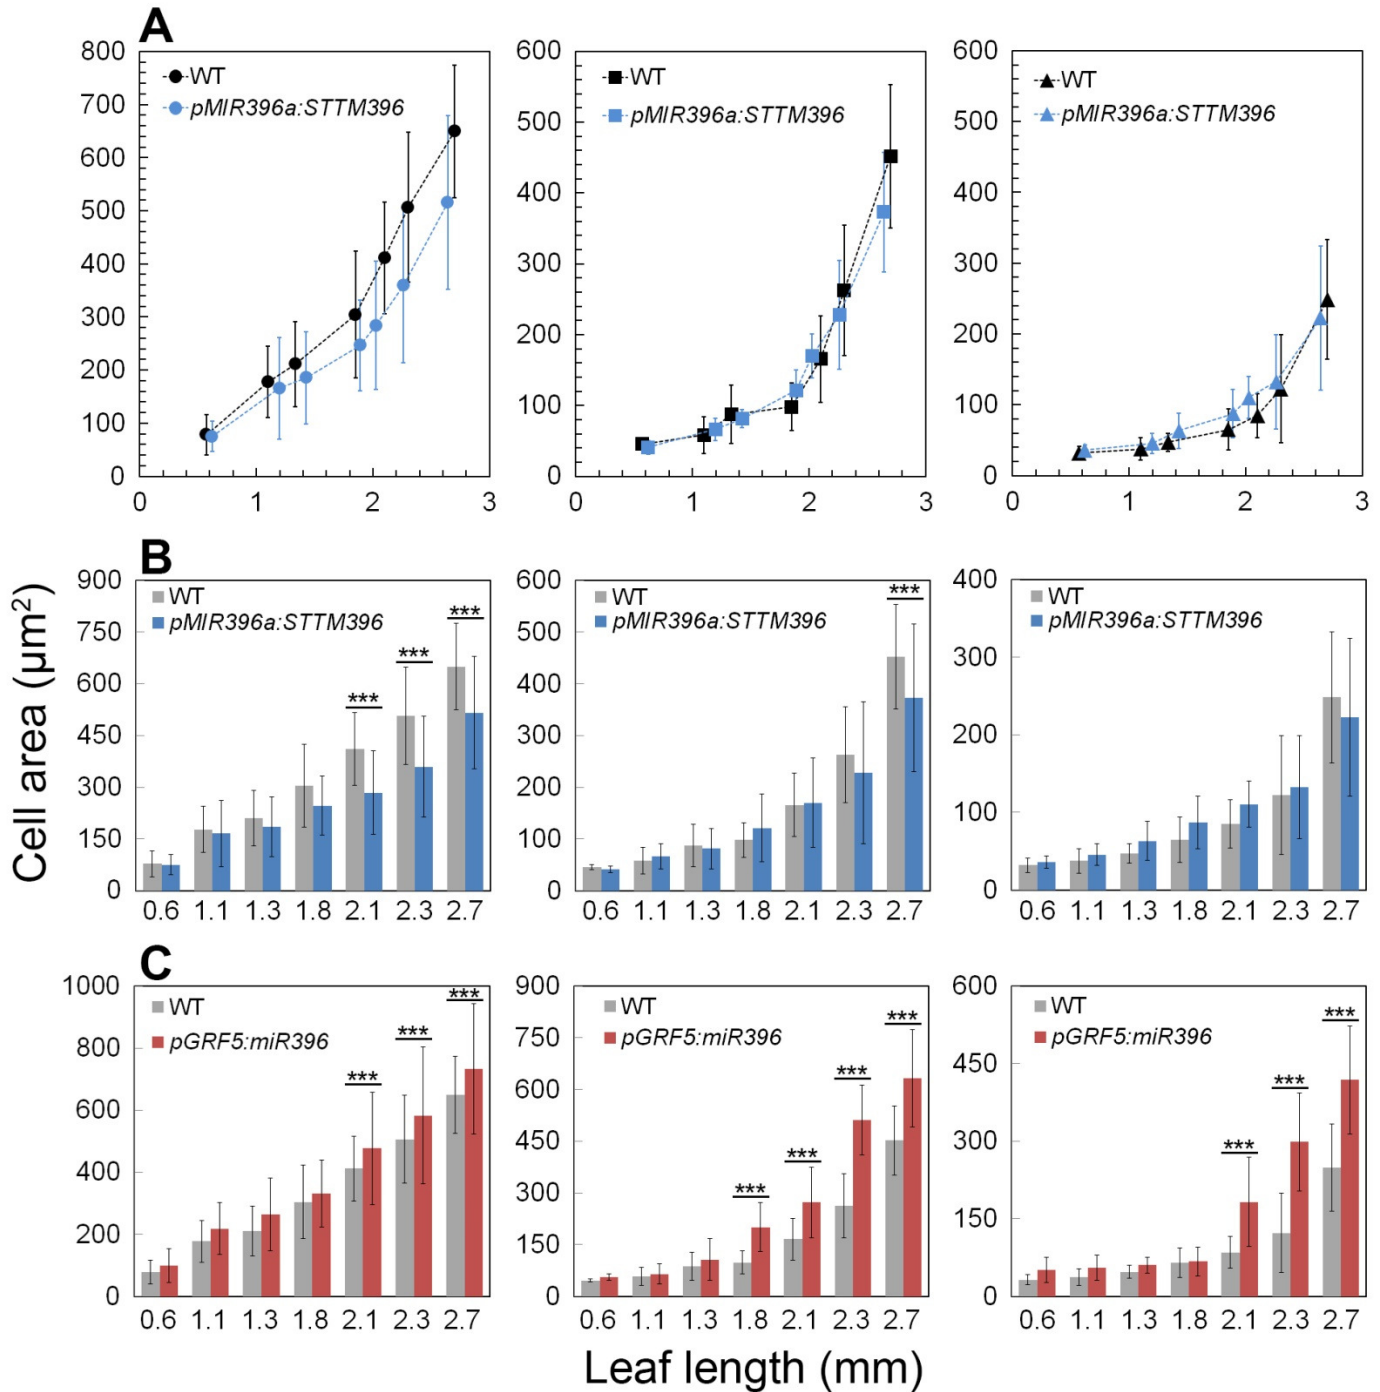

**Supplemental Figure 10. Effects of altered miR396 expression on cell expansion.** (A-B) Epidermal cell size of the 5<sup>th</sup> leaf in the *pMIR396a:STTM396* and WT plants ( $n=40-90$ ; average  $\pm$  SD). (C) Epidermal cell size of the 5<sup>th</sup> leaf in the *pMIR396a:STTM396* and WT plants ( $n=50-100$ ; average  $\pm$  SD). Cell sizes were measured near the tip, middle, and base of the leaves. Unpaired t-test was carried out using GraphPad Prism software to compare the datasets. \*,  $p \leq 0.05$ ; \*\*\*,  $p \leq 0.005$ . P-value summaries are shown only above the datasets that showed significant differences.

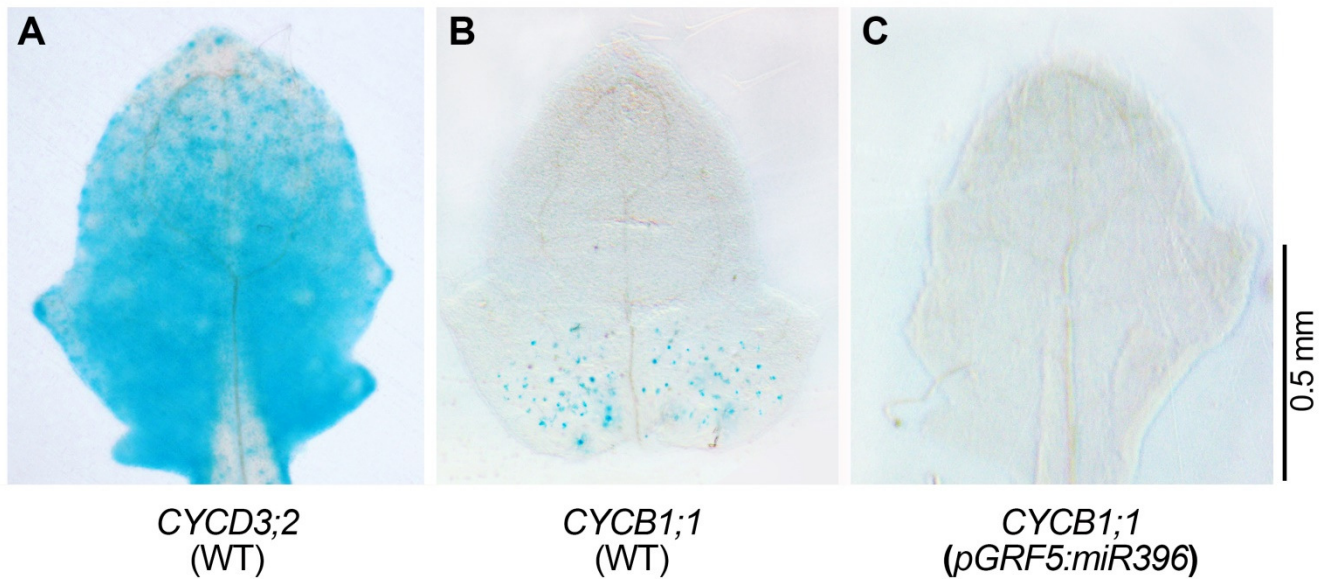

**Supplemental Figure 11. Effect of miR396 mis-expression on *CYCB1;1* expression.** GUS reporter assay showing the expression of *CYCD3;2* (A) and *CYCB1;1* (B, C) in young WT (A, B) and *pGRF5:miR396* (C) leaves. Note that the GUS activity is completely absent from the ~1 mm long *pGRF5:miR396* leaf while it is still present at the base of WT leaf of similar growth stage.

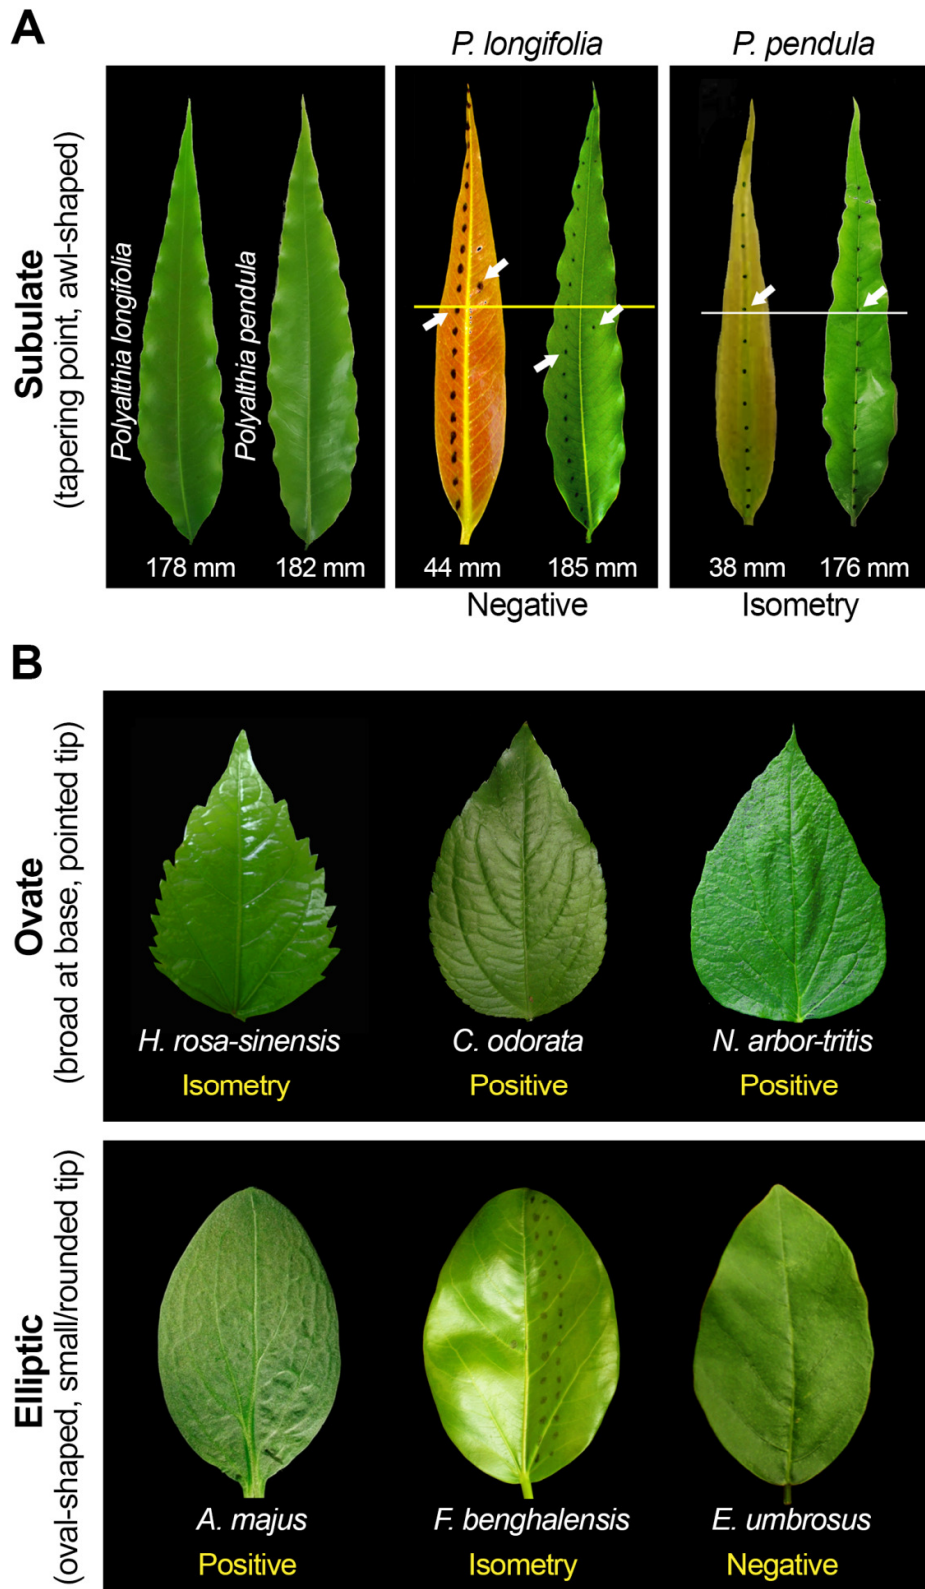

**Supplemental Figure 12. Different allometric growth patterns in leaves with similar final shapes.** (A) The leaves of *P. pendula* and *P. longifolia* have similar final shape and size but show isometry and negative allometry, respectively, during growth. Numbers indicate leaf length. (B) Leaves with similar final shapes that show different allometric growth patterns.

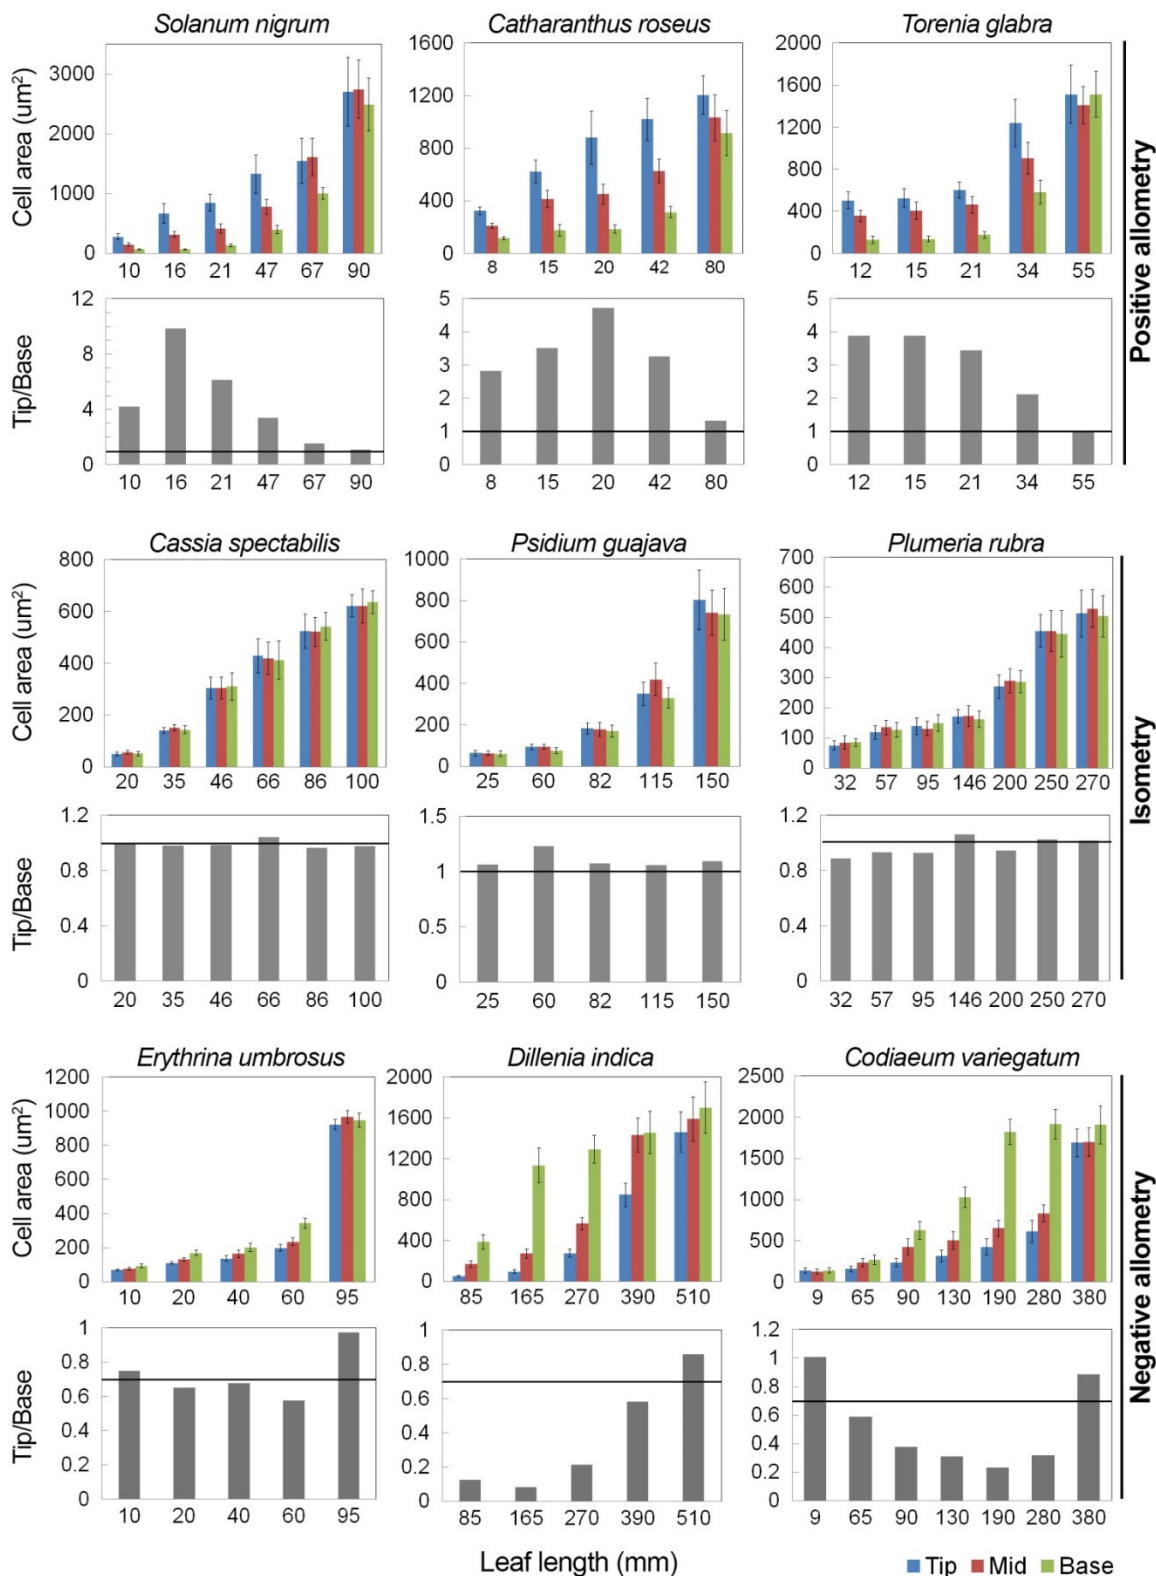

**Supplemental Figure 13. Determination of allometric growth patterns in leaves using cell size difference.** Under each allometry class, the upper panels show cell size measurements near the tip, mid, and base of growing leaves and the lower panels show the ratio of average epidermal cell area near the tip to that of the base. The species with cell size ratio 0.9-1.2 were classified under isometry and the species with the ratio <0.7 for at least three growth stages were assigned to negative allometry. The species with tip:base cell size ratios  $\geq 1.5$  for three or more growth stages were assigned to positive allometry. This classification is supported by the  $\alpha$  values shown in Figure 2.

**Supplemental Table 1.** List of species used in the study

|    | <b>Species</b>                    | <b>Order</b>   | <b>Family</b>    | <b>Allometry</b> |
|----|-----------------------------------|----------------|------------------|------------------|
| 1  | <i>Schefflera arboricola</i>      | Apiales        | Araliaceae       | Isometry         |
| 2  | <i>Chromolaena odorata</i>        | Asterales      | Asteraceae       | Positive         |
| 3  | <i>Dahlia x hybrid</i>            | Asterales      | Asteraceae       | Positive         |
| 4  | <i>Gaillardia aristata</i>        | Asterales      | Asteraceae       | Positive         |
| 5  | <i>Helianthus annuus</i>          | Asterales      | Asteraceae       | Positive         |
| 6  | <i>Lactuca sativa</i>             | Asterales      | Asteraceae       | Positive         |
| 7  | <i>Raphanus sativus</i>           | Asterales      | Asteraceae       | Positive         |
| 8  | <i>Sonchus oleraceus</i>          | Asterales      | Asteraceae       | Positive         |
| 9  | <i>Syndrella nodiflora</i>        | Asterales      | Asteraceae       | Positive         |
| 10 | <i>Arabidopsis thaliana</i>       | Brassicales    | Brassicaceae     | Positive         |
| 11 | <i>Brassica juncea</i>            | Brassicales    | Brassicaceae     | Positive         |
| 12 | <i>Cleome speciosa</i>            | Brassicales    | Capparidaceae    | Positive         |
| 13 | <i>Spinacia oleracea,</i>         | Caryophyllales | Amaranthaceae    | Positive         |
| 14 | <i>Momordica pudica</i>           | Cucurbitales   | Cucurbitaceae    | Positive         |
| 15 | <i>Impatiens balsamina</i>        | Ericales       | Balsaminaceae    | Positive         |
| 16 | <i>Bauhinia purpurea</i>          | Fabales        | Fabaceae         | Isometry         |
| 17 | <i>Brownea coccinea</i>           | Fabales        | Fabaceae         | Isometry         |
| 18 | <i>Butea monosperma</i>           | Fabales        | Fabaceae         | Isometry         |
| 19 | <i>Cassia spectabilis</i>         | Fabales        | Fabaceae         | Isometry         |
| 20 | <i>Erythrina standleyana</i>      | Fabales        | Fabaceae         | Isometry         |
| 21 | <i>Erythrina umbrosus</i>         | Fabales        | Fabaceae         | Negative         |
| 22 | <i>Samanea saman</i>              | Fabales        | Fabaceae         | Isometry         |
| 23 | <i>Saraca asoca</i>               | Fabales        | Fabaceae         | Isometry         |
| 24 | <i>Alstonia scholaris</i>         | Gentianales    | Apocynaceae      | Isometry         |
| 25 | <i>Calotropis gigantea</i>        | Gentianales    | Apocynaceae      | Positive         |
| 26 | <i>Catharantus roseus</i>         | Gentianales    | Apocynaceae      | Positive         |
| 27 | <i>Coffea arabica</i>             | Gentianales    | Rubiaceae        | Isometry         |
| 28 | <i>Ixora coccinea</i>             | Gentianales    | Rubiaceae        | Isometry         |
| 29 | <i>Mussaenda glabra</i>           | Gentianales    | Rubiaceae        | Positive         |
| 30 | <i>Neolamarckia cadamba</i>       | Gentianales    | Rubiaceae        | Isometry         |
| 31 | <i>Plumeria rubra</i>             | Gentianales    | Apocynaceae      | Isometry         |
| 32 | <i>Tabernaemontana divaricata</i> | Gentianales    | Apocynaceae      | Isometry         |
| 33 | <i>Antirrhinum majus</i>          | Lamiales       | Plantaginaceae   | Positive         |
| 34 | <i>Mentha arvensis</i>            | Lamiales       | Lamiaceae        | Positive         |
| 35 | <i>Salvia coccinea</i>            | Lamiales       | Lamiaceae        | Positive         |
| 36 | <i>Torenia glabra</i>             | Lamiales       | Scrophulariaceae | Positive         |
| 37 | <i>Citharexylum fruticosum</i>    | Lamiales       | Verbenaceae      | Positive         |
| 38 | <i>Hemigraphis colorata</i>       | Lamiales       | Acanthaceae      | Positive         |
| 39 | <i>Lantana camara</i>             | Lamiales       | Verbenaceae      | Positive         |
| 40 | <i>Leucas stelligera</i>          | Lamiales       | Lamiaceae        | Positive         |
| 41 | <i>Nyctanthes arbor-tritis</i>    | Lamiales       | Oleaceae         | Positive         |
| 42 | <i>Ocimum tenuiflorum</i>         | Lamiales       | Lamiaceae        | Positive         |
| 43 | <i>Spathodea campanulata</i>      | Lamiales       | Bignoniaceae     | Isometry         |
| 44 | <i>Tecoma stans</i>               | Lamiales       | Bignoniaceae     | Positive         |

| <b>Species</b>                     | <b>Order</b> | <b>Family</b> | <b>Allometry</b> |
|------------------------------------|--------------|---------------|------------------|
| 45 <i>Cananga odorata</i>          | Magnoliales  | Annonaceae    | Isometry         |
| 46 <i>Polyalthia longifolia</i>    | Magnoliales  | Annonaceae    | Negative         |
| 47 <i>Polyalthia pendula</i>       | Magnoliales  | Annonaceae    | Isometry         |
| 48 <i>Codiaeum variegatum</i>      | Malpighiales | Euphorbiaceae | Negative         |
| 49 <i>Abutilon indicum</i>         | Malvales     | Malvaceae     | Isometry         |
| 50 <i>Ceiba pentandra</i>          | Malvales     | Bombacaceae   | Isometry         |
| 51 <i>Ceiba speciosa</i>           | Malvales     | Bombacaceae   | Isometry         |
| 52 <i>Hibiscus rosa-sinensis</i>   | Malvales     | Malvaceae     | Isometry         |
| 53 <i>Callistemon viminalis</i>    | Myrtales     | Myrtaceae     | Isometry         |
| 54 <i>Psidium guajava</i>          | Myrtales     | Myrtaceae     | Isometry         |
| 55 <i>Syzygium jambos</i>          | Myrtales     | Myrtaceae     | Bidirectional    |
| 56 <i>Terminalia catappa</i>       | Myrtales     | Combretaceae  | Negative         |
| 57 <i>Artocarpus heterophyllus</i> | Rosales      | Moraceae      | Isometry         |
| 58 <i>Broussonetia papyrifera</i>  | Rosales      | Moraceae      | Isometry         |
| 59 <i>Ficus auriculata</i>         | Rosales      | Moraceae      | Isometry         |
| 60 <i>Ficus benghalensis</i>       | Rosales      | Moraceae      | Isometry         |
| 61 <i>Ficus religiosa</i>          | Rosales      | Moraceae      | Isometry         |
| 62 <i>Aeglem armelos</i>           | Sapindales   | Rutaceae      | Isometry         |
| 63 <i>Azadirachta indica</i>       | Sapindales   | Meliaceae     | Positive         |
| 64 <i>Cedrela odorata</i>          | Sapindales   | Meliaceae     | Isometry         |
| 65 <i>Citrus grandis</i>           | Sapindales   | Rutaceae      | Isometry         |
| 66 <i>Mangifera indica</i>         | Sapindales   | Anacardiaceae | Isometry         |
| 67 <i>Capsicum annuum</i>          | Solanales    | Solanaceae    | Positive         |
| 68 <i>Solanum lycopersicum</i>     | Solanales    | Solanaceae    | Positive         |
| 69 <i>Nicotiana tabacum</i>        | Solanales    | Solanaceae    | Positive         |
| 70 <i>Nycandra physaloides</i>     | Solanales    | Solanaceae    | Positive         |
| 71 <i>Petunia x hybrid</i>         | Solanales    | Solanaceae    | Positive         |
| 72 <i>Solanum nigrum</i>           | Solanales    | Solanaceae    | Positive         |
| 73 <i>Datura metel</i>             | Solanales    | Solanaceae    | Positive         |
| 74 <i>Heliotropium indicum</i>     | unplaced     | Boraginaceae  | Positive         |
| 75 <i>Dillenia indica</i>          | unplaced     | Dilleniaceae  | Negative         |

**Supplemental Table 2.** Methods used to classify the growth patterns.

|    | <b>Species</b>                    | <b>Allometry</b> | <b>Methods applied to classify pattern</b> |                            |                        |
|----|-----------------------------------|------------------|--------------------------------------------|----------------------------|------------------------|
|    |                                   |                  | Distribution of spots                      | Growth ratio determination | Cell size distribution |
| 1  | <i>Schefflera arboricola</i>      | Isometry         | Blue                                       | White                      | Green                  |
| 2  | <i>Chromolaena odorata</i>        | Positive         | Blue                                       | Red                        | Green                  |
| 3  | <i>Dahlia x hybrid</i>            | Positive         | Blue                                       | White                      | Green                  |
| 4  | <i>Gaillardia aristata</i>        | Positive         | White                                      | Red                        | White                  |
| 5  | <i>Helianthus annuus</i>          | Positive         | Blue                                       | Red                        | Green                  |
| 6  | <i>Lactuca sativa</i>             | Positive         | Blue                                       | White                      | Green                  |
| 7  | <i>Raphanus sativus</i>           | Positive         | White                                      | White                      | Green                  |
| 8  | <i>Sonchus oleraceus</i>          | Positive         | White                                      | White                      | Green                  |
| 9  | <i>Syndrella nodiflora</i>        | Positive         | Blue                                       | White                      | White                  |
| 10 | <i>Arabidopsis thaliana</i>       | Positive         | White                                      | White                      | Green                  |
| 11 | <i>Brassica juncea</i>            | Positive         | White                                      | White                      | Green                  |
| 12 | <i>Cleome speciosa</i>            | Positive         | White                                      | White                      | Green                  |
| 13 | <i>Spinacia oleracea,</i>         | Positive         | White                                      | White                      | Green                  |
| 14 | <i>Momordica pudica</i>           | Positive         | White                                      | White                      | Green                  |
| 15 | <i>Impatiens balsamina</i>        | Positive         | Blue                                       | Red                        | Green                  |
| 16 | <i>Bauhinia purpurea</i>          | Isometry         | Blue                                       | Red                        | Green                  |
| 17 | <i>Brownea coccinea</i>           | Isometry         | White                                      | White                      | Green                  |
| 18 | <i>Butea monosperma</i>           | Isometry         | White                                      | White                      | Green                  |
| 19 | <i>Cassia spectabilis</i>         | Isometry         | Blue                                       | Red                        | Green                  |
| 20 | <i>Erythrina standleyana</i>      | Isometry         | Blue                                       | Red                        | Green                  |
| 21 | <i>Erythrina umbrosus</i>         | Negative         | Blue                                       | Red                        | Green                  |
| 22 | <i>Samanea saman</i>              | Isometry         | White                                      | White                      | Green                  |
| 23 | <i>Saraca asoca</i>               | Isometry         | Blue                                       | Red                        | Green                  |
| 24 | <i>Alstonia scholaris</i>         | Isometry         | Blue                                       | White                      | Green                  |
| 25 | <i>Calotropis gigantea</i>        | Positive         | Blue                                       | Red                        | Green                  |
| 26 | <i>Catharantus roseus</i>         | Positive         | Blue                                       | White                      | Green                  |
| 27 | <i>Coffea arabica</i>             | Isometry         | Blue                                       | Red                        | Green                  |
| 28 | <i>Ixora coccinea</i>             | Isometry         | Blue                                       | Red                        | Green                  |
| 29 | <i>Mussaenda glabra</i>           | Positive         | Blue                                       | White                      | Green                  |
| 30 | <i>Neolamarckia cadamba</i>       | Isometry         | White                                      | White                      | Green                  |
| 31 | <i>Plumeria rubra</i>             | Isometry         | Blue                                       | White                      | Green                  |
| 32 | <i>Tabernaemontana divaricata</i> | Isometry         | White                                      | White                      | Green                  |
| 33 | <i>Antirrhinum majus</i>          | Positive         | Blue                                       | Red                        | Green                  |
| 34 | <i>Mentha arvensis</i>            | Positive         | White                                      | White                      | Green                  |
| 35 | <i>Salvia coccinea</i>            | Positive         | White                                      | White                      | Green                  |
| 36 | <i>Torenia glabra</i>             | Positive         | Blue                                       | Red                        | Green                  |
| 37 | <i>Citharexylum fruiticosum</i>   | Positive         | White                                      | White                      | Green                  |
| 38 | <i>Hemigraphis colorata</i>       | Positive         | White                                      | White                      | Green                  |
| 39 | <i>Lantana camara</i>             | Positive         | Blue                                       | White                      | Green                  |



|    | Species                         | Allometry     | Methods applied to classify pattern |                            |                        |
|----|---------------------------------|---------------|-------------------------------------|----------------------------|------------------------|
|    |                                 |               | Distribution of spots               | Growth ratio determination | Cell size distribution |
| 40 | <i>Leucas stelligera</i>        | Positive      |                                     |                            |                        |
| 41 | <i>Nyctanthes arbor-tritis</i>  | Positive      |                                     |                            |                        |
| 42 | <i>Ocimum tenuiflorum</i>       | Positive      |                                     |                            |                        |
| 43 | <i>Spathodea campanulata</i>    | Isometry      |                                     |                            |                        |
| 44 | <i>Tecoma stans</i>             | Positive      |                                     |                            |                        |
| 45 | <i>Cananga odorata</i>          | Isometry      |                                     |                            |                        |
| 48 | <i>Codiaeum variegatum</i>      | Negative      |                                     |                            |                        |
| 49 | <i>Abutilon indicum</i>         | Isometry      |                                     |                            |                        |
| 50 | <i>Ceiba pentandra</i>          | Isometry      |                                     |                            |                        |
| 51 | <i>Ceiba speciosa</i>           | Isometry      |                                     |                            |                        |
| 52 | <i>Hibiscus rosa-sinensis</i>   | Isometry      |                                     |                            |                        |
| 53 | <i>Callistemon viminalis</i>    | Isometry      |                                     |                            |                        |
| 54 | <i>Psidium guajava</i>          | Isometry      |                                     |                            |                        |
| 55 | <i>Syzygium jambos</i>          | Bidirectional |                                     |                            |                        |
| 56 | <i>Terminalia catappa</i>       | Negative      |                                     |                            |                        |
| 57 | <i>Artocarpus heterophyllus</i> | Isometry      |                                     |                            |                        |
| 58 | <i>Broussonetia papyrifera</i>  | Isometry      |                                     |                            |                        |
| 59 | <i>Ficus auriculata</i>         | Isometry      |                                     |                            |                        |
| 60 | <i>Ficus benghalensis</i>       | Isometry      |                                     |                            |                        |
| 61 | <i>Ficus religiosa</i>          | Isometry      |                                     |                            |                        |
| 62 | <i>Aegle marmelos</i>           | Isometry      |                                     |                            |                        |
| 63 | <i>Azadirachta indica</i>       | Positive      |                                     |                            |                        |
| 64 | <i>Cedrela odorata</i>          | Isometry      |                                     |                            |                        |
| 65 | <i>Citrus grandis</i>           | Isometry      |                                     |                            |                        |
| 66 | <i>Mangifera indica</i>         | Isometry      |                                     |                            |                        |
| 67 | <i>Capsicum annuum</i>          | Positive      |                                     |                            |                        |
| 68 | <i>Solanum lycopersicum</i>     | Positive      |                                     |                            |                        |
| 69 | <i>Nicotiana tabacum</i>        | Positive      |                                     |                            |                        |
| 70 | <i>Nycandra physaloides</i>     | Positive      |                                     |                            |                        |
| 71 | <i>Petunia x hybrid</i>         | Positive      |                                     |                            |                        |
| 72 | <i>Solanum nigrum</i>           | Positive      |                                     |                            |                        |
| 73 | <i>Datura metel</i>             | Positive      |                                     |                            |                        |
| 74 | <i>Heliotropium indicum</i>     | Positive      |                                     |                            |                        |
| 75 | <i>Dillenia indica</i>          | Negative      |                                     |                            |                        |

Highlighted cells indicate the method/s applied to assign the growth patterns

**Supplemental Table 3.** Accession numbers of sequences used in the study

| <b>Gene</b>                                           | <b>Species</b>               | <b>Accession</b> |
|-------------------------------------------------------|------------------------------|------------------|
| Growth-regulating factor 2 ( <i>GRF2</i> )            | <i>Arabidopsis thaliana</i>  | NM_119936        |
| GRF domain class transcription factor ( <i>GRF2</i> ) | <i>Arabidopsis lyrata</i>    | XM_002866887     |
| Growth-regulating factor 2 ( <i>GRF2B2</i> )          | <i>Brassica napus</i>        | JN831663         |
| Growth-regulating factor 2J ( <i>GRF2J</i> )          | <i>Brassica rapa</i>         | JN698987         |
| GRF domain class transcription factor ( <i>GRF2</i> ) | <i>Populus trichocarpa</i>   | XM_002320632     |
| GRF domain class transcription factor ( <i>GRF2</i> ) | <i>Vitis vinifera</i>        | XM_003635328     |
| GRF domain class transcription factor ( <i>GRF2</i> ) | <i>Malus x domestica</i>     | HM122562         |
| GRF domain class transcription factor ( <i>GRF2</i> ) | <i>Glycine max</i>           | XM_003549319     |
| GRF domain class transcription factor ( <i>GRF2</i> ) | <i>Ricinus communis</i>      | XM_002510006     |
| GRF domain class transcription factor ( <i>GRF2</i> ) | <i>Capsicum annuum</i>       | FJ997852         |
| Growth-regulating factor 2 (Ts- <i>GRF2</i> )         | <i>Tecoma stans</i>          | KF188429         |
| Growth-regulating factor 2 (Bh- <i>GRF2</i> )         | <i>Bauhinia purpurea</i>     | KF042295         |
| Growth-regulating factor 2 (Cv- <i>GRF2</i> )         | <i>Codiaeum variegatum</i>   | KF042296         |
| Histone H4 (Ts- <i>H4</i> )                           | <i>Tecoma stans</i>          | KF042290         |
| Histone H4 (Bp- <i>H4</i> )                           | <i>Bauhinia purpurea</i>     | KF042292         |
| Histone H4 (Cv- <i>H4</i> )                           | <i>Codiaeum variegatum</i>   | KF042291         |
| Actin 1 (Ts- <i>ACT1</i> )                            | <i>Tecoma stans</i>          | KF188428         |
| Actin 1 (Bp- <i>ACT1</i> )                            | <i>Bauhinia purpurea</i>     | KF042293         |
| Tubulin 1 (Cv- <i>TUB1</i> )                          | <i>Codiaeum variegatum</i>   | KF042294         |
| miR396b                                               | <i>Arabidopsis thaliana</i>  | MI0001014        |
| miR396c                                               | <i>Oryza sativa</i>          | MI0001048        |
| miR396c                                               | <i>Sorghum bicolor</i>       | MI0001540        |
| miR396b                                               | <i>Glycine max</i>           | MI0001786        |
| miR396c                                               | <i>Populus trichocarpa</i>   | MI0002327        |
| miR396d                                               | <i>Populus trichocarpa</i>   | MI0002328        |
| miR396e                                               | <i>Populus trichocarpa</i>   | MI0002329        |
| miR396a                                               | <i>Medicago truncatula</i>   | MI0005621        |
| miR396a                                               | <i>Brassica napus</i>        | MI0005773        |
| miR396                                                | <i>Pinus taeda</i>           | MI0005788        |
| miR396c                                               | <i>Glycine max</i>           | MI0010572        |
| miR396b                                               | <i>Aquilegia caerulea</i>    | MI0012095        |
| miR396                                                | <i>Citrus clementine</i>     | MI0013304        |
| miR396                                                | <i>Ricinus communis</i>      | MI0013418        |
| miR396b                                               | <i>Arabidopsis lyrata</i>    | MI0014582        |
| miR396a                                               | <i>Aquilegia caerulea</i>    | MI0012094        |
| miR396                                                | <i>Lotus japonicus</i>       | MI0010581        |
| miR396c                                               | <i>Vitis vinifera</i>        | MI0007955        |
| miR396d                                               | <i>Vitis vinifera</i>        | MI0006571        |
| miR319a                                               | <i>Arabidopsis thaliana</i>  | MI0000544        |
| miR319b                                               | <i>Arabidopsis thaliana</i>  | MI0000545        |
| miR319b                                               | <i>Arabidopsis lyrata</i>    | MI0014519        |
| miR319                                                | <i>Triticum aestivum</i>     | MI0016453        |
| miR319a                                               | <i>Arabidopsis lyrata</i>    | MI0014518        |
| miR319a                                               | <i>Ricinus communis</i>      | MIMAT0014180     |
| miR319c                                               | <i>Ricinus communis</i>      | MIMAT0014181     |
| miR319                                                | <i>Aquilegia caerulea</i>    | MI0012091        |
| miR319c                                               | <i>Vitis vinifera</i>        | MIMAT0005704     |
| miR319f                                               | <i>Vitis vinifera</i>        | MIMAT0005705     |
| miR319                                                | <i>Citrus trifoliata</i>     | MI0013303        |
| miR319c                                               | <i>Populus trichocarpa</i>   | MI0002298        |
| miR319d                                               | <i>Populus trichocarpa</i>   | MI0002299        |
| miR319b                                               | <i>Populus trichocarpa</i>   | MI0002297        |
| miR319a                                               | <i>Glycine max</i>           | MI0001782        |
| miR319b                                               | <i>Glycine max</i>           | MI0001783        |
| miR319                                                | <i>Medicago truncatula</i>   | MI0001751        |
| miR319a                                               | <i>Physcomitrella patens</i> | MI0003496        |
| miR319b                                               | <i>Physcomitrella patens</i> | MI0003497        |
| miR319                                                | <i>Solanum lycopersicum</i>  | MI0009978        |

| <b>Gene</b> | <b>Species</b>            | <b>Accession</b> |
|-------------|---------------------------|------------------|
| miR319      | <i>Pinus taeda</i>        | MI0005786        |
| miR319      | <i>Phaseolus vulgaris</i> | MIMAT0011176     |
| miR319      | <i>Citrus sinensis</i>    | MIMAT0018459     |

**Supplemental Table 4.** Primers used in the study

| Sl. No. | Primer Name | Sequence 5'-3'                         | Forward/Reverse | Purpose                                                             |
|---------|-------------|----------------------------------------|-----------------|---------------------------------------------------------------------|
| 1       | P02047      | GAGYTDGARCAHCARGCVTTGATC               | FP              | Degenerate primer for cloning <i>GRF</i>                            |
| 2       | P02048      | CWCARTGGRYKGAGYTRGARCAHC               | FP              | Degenerate primer for cloning <i>GRF</i>                            |
| 3       | P02049      | CTTYTG HARVACHCCHGTNGG RGA             | RP              | Degenerate primer for cloning <i>GRF</i>                            |
| 4       | P02050      | TTYTG HARVACHCCHGTNGG RGA              | RP              | Degenerate primer for cloning <i>GRF</i>                            |
| 5       | P02233      | ATGGAYCTNGARCCNGGNACNATGG              | FP              | Degenerate primer for cloning <i>TUBULIN</i>                        |
| 6       | P02234      | GRGARGARTAYCCNGAYMGRATGATG             | FP              | Degenerate primer for cloning <i>TUBULIN</i>                        |
| 7       | P02235      | CRTTCATRTRCTYTCNGCYTCNG                | RP              | Degenerate primer for cloning <i>TUBULIN</i>                        |
| 8       | P02236      | CATNCCYTCNCCDGTTRTACCARTG              | RP              | Degenerate primer for cloning <i>TUBULIN</i>                        |
| 9       | P02237      | GGDACNGGHATGGTBAARGCBGG                | FP              | Degenerate primer for cloning <i>ACTIN</i>                          |
| 10      | P02238      | CCWCCDATCCAGACRCTRAYTTYC               | RP              | Degenerate primer for cloning <i>ACTIN</i>                          |
| 11      | P02124      | GGNGAYGARGCNCARTCHAARMGDGG             | FP              | Degenerate primer for cloning <i>ACTIN</i>                          |
| 12      | P02125      | CRTGDATDCCHGVDGCTTCCATHCC              | RP              | Degenerate primer for cloning <i>ACTIN</i>                          |
| 13      | P00658      | ATGTCDGGNMGNNGVAARGGMGGNAARGG          | FP              | Degenerate primer for cloning <i>HISTONE4</i>                       |
| 14      | P00659      | CCDCCRAANCCRTANAGDGTNCKNCC             | RP              | Degenerate primer for cloning <i>HISTONE4</i>                       |
| 15      | P02237      | GTCATCCTTGCGCAGGGGCCATGC               |                 | Probe sequence for <i>A. thaliana</i> U6 snoRNA                     |
| 16      | P01524      | AGAATTCGCCGTCGAGTGTGAGTTTAGTCC<br>G    | FP              | Clone miR396a promoter from <i>A. thaliana</i> ( <i>Eco</i> RI)     |
| 17      | P01525      | AGGATCCAGAGAGGGTCATGTAGAGCAGA<br>CG    | RP              | Clone miR396a promoter from <i>A. thaliana</i> ( <i>Bam</i> HI)     |
| 18      | P01503      | ATCTAGA CTATCGACCATCTTCCTTCTCAC        | FP              | Clone miR396a hairpin from <i>A. thaliana</i> ( <i>Xba</i> I)       |
| 19      | P01504      | TTTCTGCAGCATAAACACCGATTAACTCAT<br>AGAC | RP              | Clone miR396a hairpin from <i>A. thaliana</i> ( <i>Pst</i> I)       |
| 20      | P01564      | ACCCGGGCGTGGTCATCGCAAGGTAACC           | FP              | Clone <i>GRF5</i> promoter from <i>A. thaliana</i> ( <i>Sma</i> I)  |
| 21      | P01529      | AGGATCCGTTCTCCCGCTACTTCCACTTAG         | RP              | Clone <i>GRF5</i> promoter from <i>A. thaliana</i> ( <i>Bam</i> HI) |
| 22      | P02258      | CGAGCGTGGGTACTCTTTCACC                 | FP              | qRT-PCR for <i>BpACT1</i>                                           |
| 23      | P02259      | GAAGAGTACTTCAGGGCAGCGG                 | RP              | qRT-PCR for <i>BpACT1</i>                                           |
| 24      | P02260      | CCTTGTCCTTCCCTCGGTTG                   | FP              | qRT-PCR for <i>CvTUB1</i>                                           |
| 25      | P02261      | GCCGTGACGAGGATCAGCAGC                  | RP              | qRT-PCR for <i>CvTUB1</i>                                           |
| 26      | P02262      | GATCTCTACGGCAACATTGTA CTAG             | FP              | qRT-PCR for <i>TsACT1</i>                                           |
| 27      | P02263      | GGGTGGTGCGACCACCTTAATC                 | RP              | qRT-PCR for <i>TsACT1</i>                                           |
| 28      | P02264      | GTCCATCCCTGTGGCTCCCG                   | FP              | qRT-PCR for <i>TsGRF2</i>                                           |
| 29      | P02265      | CGGTTCCGCAAGATCGTGACTC                 | RP              | qRT-PCR for <i>TsGRF2</i>                                           |
| 30      | P02266      | CACCGATCCTGAGCCAGGGAG                  | FP              | qRT-PCR for <i>BpGRF2</i>                                           |
| 31      | P02267      | GTGACGGCATGGCCTGATTGGC                 | RP              | qRT-PCR for <i>BpGRF2</i>                                           |
| 32      | P02268      | GTGAACGCCATATGAACAGGGGC                | FP              | qRT-PCR for <i>CvGRF2</i>                                           |

| Sl. No. | Primer Name | Sequence 5'-3'                                                                                                                   | Forward/Reverse | Purpose                   |
|---------|-------------|----------------------------------------------------------------------------------------------------------------------------------|-----------------|---------------------------|
| 33      | P02269      | GTGGTGATGCTGTGCAATGGCG                                                                                                           | RP              | qRT-PCR for <i>CvGRF2</i> |
| 34      | P02270      | CAAGGAATCACCAAGCCGGCG                                                                                                            | FP              | qRT-PCR for <i>CvH4</i>   |
| 35      | P02271      | CTTCTCCGAAACCATATAGAGTACG                                                                                                        | RP              | qRT-PCR for <i>CvH4</i>   |
| 36      | P02272      | CATCCAGGGTATCACGAAGCCGG                                                                                                          | FP              | qRT-PCR for <i>TsH4</i>   |
| 37      | P02273      | GTCAGTGTCTTCCGGCGAGCG                                                                                                            | RP              | qRT-PCR for <i>TsH4</i>   |
| 38      | P02274      | GGGTATCACGAAGCCTGCAATTCG                                                                                                         | FP              | qRT-PCR for <i>BpH4</i>   |
| 39      | P02275      | CCGTCCGAGCATGCTCAGTGTAGG                                                                                                         | RP              | qRT-PCR for <i>BpH4</i>   |
| 40      | P01840      | GGTTAGGCAAAGGAGGAGCAAAG                                                                                                          | FP              | qRT-PCR for <i>AtH4</i>   |
| 41      | P01841      | CCATAGCAGTCACCGTCTTCCTC                                                                                                          | RP              | qRT-PCR for <i>AtH4</i>   |
| 42      | P02052      | TCCTCCCATGGCAACTATCTC                                                                                                            | FP              | qRT-PCR for <i>AtGRF2</i> |
| 43      | P02053      | GCTTCGTTGCAAGCAATCCT                                                                                                             | RP              | qRT-PCR for <i>AtGRF2</i> |
| 44      | P01845      | GCTCTTCGTAACCCAACCAACAAGA                                                                                                        | FP              | qRT-PCR for <i>AtGRF3</i> |
| 45      | P01847      | GCTGCTGCTGGCTTCTCCATTG                                                                                                           | RP              | qRT-PCR for <i>AtGRF3</i> |
| 46      | P01848      | TGGTCATGGACCAACAACAACCA                                                                                                          | FP              | qRT-PCR for <i>AtGRF4</i> |
| 47      | P01850      | AGGACGTGTTGTTACCGGGCA                                                                                                            | RP              | qRT-PCR for <i>AtGRF4</i> |
| 48      | P01852      | GGGCTTGGTGGAAGTAGTAGTAACA                                                                                                        | FP              | qRT-PCR for <i>AtGRF5</i> |
| 49      | P01853      | ACGTTCTCTCCCAACTCCTCCA                                                                                                           | RP              | qRT-PCR for <i>AtGRF5</i> |
| 50      | P01855      | CCATAGAACCTTCCGGGTCAATC                                                                                                          | FP              | qRT-PCR for <i>AtGRF6</i> |
| 51      | P01856      | ACATCAATGGCCTCTCACGTGTC                                                                                                          | RP              | qRT-PCR for <i>AtGRF6</i> |
| 52      | P01857      | TGCAGGAAATGGACTTTTGGGTTGT                                                                                                        | FP              | qRT-PCR for <i>AtGRF7</i> |
| 53      | P01857      | TCCGGCATCTTCCCGGCTCT                                                                                                             | RP              | qRT-PCR for <i>AtGRF7</i> |
| 54      | P01860      | CACACCCGCCGTTCTGGTT                                                                                                              | FP              | qRT-PCR for <i>AtGRF8</i> |
| 55      | P01862      | GTGTGAGAAGCTCTGGAGGAACAG                                                                                                         | RP              | qRT-PCR for <i>AtGRF8</i> |
| 56      | P02042      | GTCTAGACAGTTCAAGAACTAAGCTGTGGAA<br>GTTGTTGTTGTTATGGTCTAATTTAAATATGG<br>TCTAAAGAAGAAGAATCAGTTCAAGAACTGA<br>GCTGTGGAACTGCAGAT      | FP              | STTM396 (XbaI and PstI)   |
| 57      | P02043      | ATCTGCAGTTCCACAGCTCAGTTCTTGA<br>ACTGATTCTTCTTTAGACCATATTTAAATTAG<br>ACCATAACAACAACA<br>ACTTCCACAGCTTAGT<br>TCTTGA<br>ACTGTCTAGAC | RP              | STTM396 (XbaI and PstI)   |

Degenerate (wobble) bases for degenerate primers:

|       |        |         |
|-------|--------|---------|
| M= AC | Y= CT  | N= AGCT |
| R= AG | K= GT  | V= AGC  |
| W= AT | D= AGT | H= ACT  |
| S= GC | B= GCT |         |

Enzyme sites are highlighted in yellow
